# Supplementary material for: Identification of Polyvalent Vaccine Candidates From Extracellular Secretory Proteins in Vibrio alginolyticus
Source: PubMed Central journal article supplement (PMC8521057; doi:10.3389/fimmu.2021.736360), 2021-10-04
Supplement: Presentation_1.pdf [file Presentation_1.pdf]

## Supplementary Material

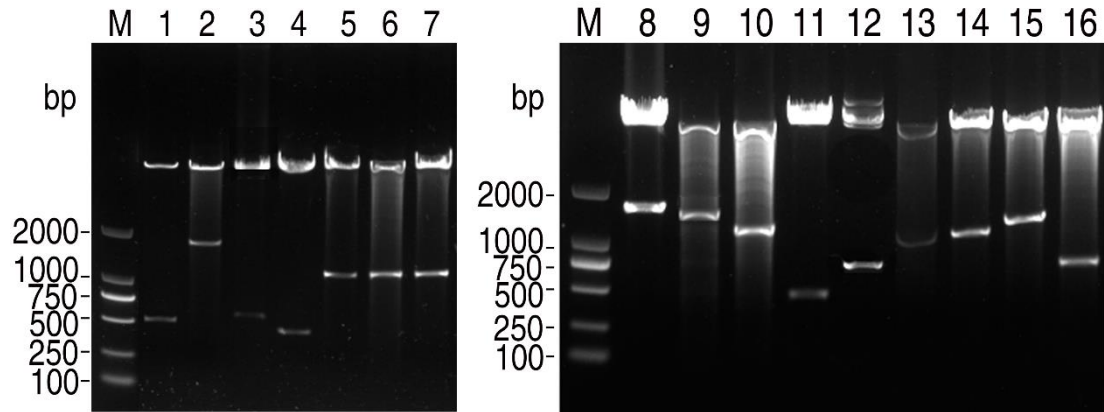

**Supplementary Figure 1.** Identification of prokaryotic expression plasmid by restriction enzyme analysis.

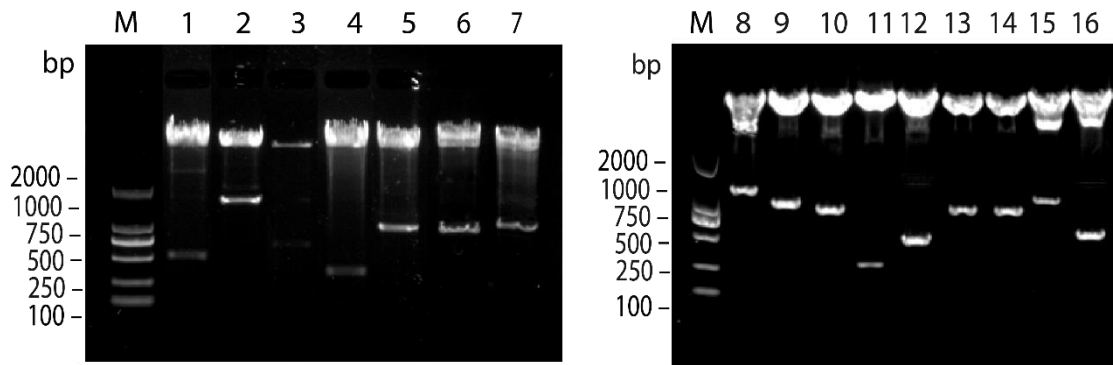

**Supplementary Figure 2.** Identification of eukaryotic expression plasmid by restriction enzyme analysis.

M: DNA marker; Lanes 1-16: AT730\_04380; AT730\_06145; AT730\_07035; AT730\_08185; AT730\_14920; AT730\_14930; AT730\_14935; AT730\_19120; AT730\_19300; AT730\_20810; AT730\_20950; AT730\_21050; AT730\_21605; AT730\_22220; AT730\_22910; AT730\_24225

**Supplementary Table 1. Primers used for qRT-PCR analysis.**

| Gene                           | Primer  | sequence(5'-3')               | Product size(bp) |
|--------------------------------|---------|-------------------------------|------------------|
| <i>EF-1<math>\alpha</math></i> | Forward | CTGGAGGCCAGCTCAAACAT          | 87               |
|                                | Reverse | GTAATGCTAGCGGTACTACTCTTCTTGAT |                  |
| <i>il-1b</i>                   | Forward | TGGACTTCGCAGCACAAAATG         | 139              |
|                                | Reverse | GTTCACTTCACGCTCTTGGATG        |                  |
| <i>il-4</i>                    | Forward | TACATTGGTCCCCGTTTCTG          | 193              |
|                                | Reverse | ACCCTTCAAAGCCATTCCCTG         |                  |
| <i>il-8</i>                    | Forward | CACGCTGTCGCTGCATTG            | 127              |
|                                | Reverse | GTCATCAAGGTGGCAATGATCTC       |                  |
| <i>il-10</i>                   | Forward | CTCTGCTCACGTTCTTC             | 189              |
|                                | Reverse | TCATCGTTGGACTCATAAAAC         |                  |
| <i>il-21</i>                   | Forward | CTAAAGTGCTGCACCTGTCAG         | 181              |
|                                | Reverse | TTGCACTGAGCTTTCTGTGTC         |                  |
| <i>tnf-<math>\alpha</math></i> | Forward | ATAAGACCCAGGGCAATCAAC         | 177              |
|                                | Reverse | CAGAGTTGTATCCACCTGTAAATG      |                  |
| <i>inf-<math>\gamma</math></i> | Forward | TTCGGGATGGATGACAT             | 141              |
|                                | Reverse | TGTAGCTGAGAATCTTCTTTAATATAG   |                  |
| <i>c3b</i>                     | Forward | TGTGACCCGCTGTATGTTCT          | 112              |
|                                | Reverse | TTGGCTGGGAAGTTCTTCAC          |                  |
| <i>tlr-1</i>                   | Forward | CACCTGCGAGGAAAGTAAGT          | 108              |
|                                | Reverse | CTGTAAGGGCGCAATCAGAC          |                  |
| <i>nf-<math>\kappa</math>b</i> | Forward | GCTCATTAGATTGCTCTACAC         | 126              |
|                                | Reverse | CGTGTCTCCGTTCTCATCT           |                  |
| <i>lysozyme</i>                | Forward | GACACTGGGACGCTGTGATG          | 174              |
|                                | Reverse | AGGCCGTGCACACATAGTTG          |                  |
| <i>cox-2</i>                   | Forward | TTCTTCGCCCAGCATTCTC           | 181              |
|                                | Reverse | AATGTGCCCCAGATCCACT           |                  |

**Supplementary Table 2. Prediction of extracellular secretory proteins in *Vibrio alginolyticus***

**ATCC33787 by PSORTb 3.0.2**

| Protein name | Location score       |             |             |                |               | Final prediction | Secondary localization(s) |
|--------------|----------------------|-------------|-------------|----------------|---------------|------------------|---------------------------|
|              | Cytoplasmic membrane | Periplasmic | Cytoplasmic | Outer membrane | Extracellular |                  |                           |
| AT730_00730  | 0.01                 | 0.2         | 0           | 0.07           | 9.72          | Extracellular    |                           |
| AT730_01435  | 0.01                 | 0.2         | 0           | 0.07           | 9.72          | Extracellular    |                           |
| AT730_02000  | 0                    | 0           | 0           | 0              | 10            | Extracellular    |                           |
| AT730_03640  | 0                    | 0           | 0           | 0              | 10            | Extracellular    |                           |
| AT730_03670  | 0.01                 | 0.2         | 0.01        | 0.07           | 9.71          | Extracellular    |                           |
| AT730_03900  | 0.01                 | 0.2         | 0.01        | 0.07           | 9.71          | Extracellular    | Host Associated           |
| AT730_03915  | 0                    | 0.04        | 0           | 1.52           | 8.44          | Extracellular    | Host Associated           |
| AT730_03940  | 0.01                 | 0.2         | 0.01        | 0.07           | 9.71          | Extracellular    | T3SS                      |
| AT730_03970  | 0.02                 | 0.19        | 0.34        | 0              | 9.45          | Extracellular    |                           |
| AT730_04070  | 0.01                 | 0.2         | 0.01        | 0.07           | 9.71          | Extracellular    |                           |
| AT730_04380  | 0.01                 | 0.2         | 0.01        | 0.07           | 9.71          | Extracellular    |                           |
| AT730_05335  | 0                    | 0           | 0           | 0              | 10            | Extracellular    | Host Associated           |
| AT730_06145  | 0.01                 | 0.11        | 0.01        | 0.23           | 9.64          | Extracellular    |                           |
| AT730_06405  | 0.01                 | 0.2         | 0.01        | 0.07           | 9.71          | Extracellular    |                           |
| AT730_06925  | 0                    | 0           | 0           | 0              | 10            | Extracellular    | Flagellar                 |
| AT730_06935  | 0                    | 0           | 0           | 0              | 10            | Extracellular    | Flagellar                 |
| AT730_06940  | 0                    | 0           | 0           | 0              | 10            | Extracellular    | Flagellar                 |
| AT730_06945  | 0                    | 0           | 0           | 0              | 10            | Extracellular    | Flagellar                 |
| AT730_07035  | 0.01                 | 0.11        | 0.01        | 0.23           | 9.64          | Extracellular    |                           |
| AT730_08185  | 0                    | 0           | 0           | 0              | 10            | Extracellular    | Fimbrial                  |
| AT730_08220  | 0                    | 0           | 0           | 0              | 10            | Extracellular    | Cytoplasmic               |
| AT730_08640  | 0                    | 0           | 0           | 0              | 10            | Extracellular    |                           |

|                 |      |      |      |      |      |                   |           |
|-----------------|------|------|------|------|------|-------------------|-----------|
| AT730_129<br>75 | 0.02 | 0.19 | 0    | 0.34 | 9.45 | Extracellul<br>ar |           |
| AT730_142<br>10 | 0    | 0    | 0    | 0    | 10   | Extracellul<br>ar | Fimbrial  |
| AT730_148<br>75 | 0.01 | 0.2  | 0.01 | 0.07 | 9.71 | Extracellul<br>ar |           |
| AT730_148<br>80 | 0.01 | 0.2  | 0.01 | 0.07 | 9.71 | Extracellul<br>ar |           |
| AT730_148<br>90 | 0    | 0    | 0    | 0    | 10   | Extracellul<br>ar | Flagellar |
| AT730_149<br>20 | 0    | 0    | 0    | 0    | 10   | Extracellul<br>ar | Flagellar |
| AT730_149<br>30 | 0    | 0    | 0    | 0    | 10   | Extracellul<br>ar | Flagellar |
| AT730_149<br>35 | 0    | 0    | 0    | 0    | 10   | Extracellul<br>ar | Flagellar |
| AT730_152<br>95 | 0.01 | 0.11 | 0    | 0.23 | 9.65 | Extracellul<br>ar |           |
| AT730_153<br>10 | 0.02 | 0.19 | 0.34 | 0    | 9.45 | Extracellul<br>ar |           |
| AT730_157<br>55 | 0    | 0    | 0    | 0    | 10   | Extracellul<br>ar |           |
| AT730_157<br>75 | 0.02 | 0.19 | 0.34 | 0    | 9.45 | Extracellul<br>ar |           |
| AT730_163<br>95 | 0.01 | 0.11 | 0    | 0.23 | 9.65 | Extracellul<br>ar |           |
| AT730_168<br>80 | 0.01 | 0.2  | 0    | 0.07 | 9.72 | Extracellul<br>ar |           |
| AT730_168<br>95 | 0.02 | 0.19 | 0.34 | 0    | 9.45 | Extracellul<br>ar |           |
| AT730_178<br>50 | 0.01 | 0.2  | 0    | 0.07 | 9.72 | Extracellul<br>ar |           |
| AT730_185<br>55 | 0    | 0    | 0    | 0    | 10   | Extracellul<br>ar |           |
| AT730_186<br>65 | 0.01 | 0.11 | 0    | 0.23 | 9.65 | Extracellul<br>ar |           |
| AT730_191<br>20 | 0.02 | 0.11 | 0.34 | 0.01 | 9.52 | Extracellul<br>ar |           |
| AT730_192<br>05 | 0.01 | 0.2  | 0.01 | 0.07 | 9.71 | Extracellul<br>ar |           |
| AT730_192<br>50 | 0.01 | 0.2  | 0    | 0.07 | 9.72 | Extracellul<br>ar |           |
| AT730_193<br>00 | 0.01 | 0.11 | 0.01 | 0.23 | 9.64 | Extracellul<br>ar |           |
| AT730_204<br>90 | 0    | 0.04 | 0    | 1.52 | 8.44 | Extracellul<br>ar | Flagellar |
| AT730_204<br>95 | 0    | 0    | 0    | 0    | 10   | Extracellul<br>ar | Flagellar |
| AT730_205<br>15 | 0    | 0    | 0    | 0    | 10   | Extracellul<br>ar | Flagellar |
| AT730_205<br>25 | 0    | 0    | 0    | 0.04 | 9.96 | Extracellul<br>ar |           |
| AT730_205<br>30 | 0.01 | 0.2  | 0.01 | 0.07 | 9.71 | Extracellul<br>ar | Fimbrial  |

|                 |      |      |      |      |      |                   |           |
|-----------------|------|------|------|------|------|-------------------|-----------|
| AT730_208<br>10 | 0.01 | 0.11 | 0.01 | 0.23 | 9.64 | Extracellul<br>ar |           |
| AT730_209<br>50 | 0.01 | 0.2  | 0.01 | 0.07 | 9.71 | Extracellul<br>ar |           |
| AT730_210<br>50 | 0.01 | 0.2  | 0.01 | 0.07 | 9.71 | Extracellul<br>ar |           |
| AT730_216<br>05 | 0.01 | 0.2  | 0    | 0.07 | 9.72 | Extracellul<br>ar |           |
| AT730_222<br>20 | 0.01 | 0.11 | 0    | 0.23 | 9.65 | Extracellul<br>ar |           |
| AT730_226<br>65 | 0    | 0    | 0    | 0    | 10   | Extracellul<br>ar |           |
| AT730_229<br>10 | 0    | 0    | 0    | 0    | 10   | Extracellul<br>ar | Flagellar |
| AT730_229<br>20 | 0    | 0    | 0    | 0    | 10   | Extracellul<br>ar | Flagellar |
| AT730_229<br>30 | 0    | 0    | 0    | 0    | 10   | Extracellul<br>ar | Flagellar |
| AT730_231<br>10 | 0.01 | 0.11 | 0.01 | 0.23 | 9.64 | Extracellul<br>ar |           |
| AT730_234<br>10 | 0    | 0    | 0    | 0    | 10   | Extracellul<br>ar |           |
| AT730_242<br>25 | 0.01 | 0.11 | 0.01 | 0.23 | 9.64 | Extracellul<br>ar |           |
| AT730_246<br>75 | 0.01 | 0.11 | 0.01 | 0.23 | 9.64 | Extracellul<br>ar |           |
| AT730_246<br>80 | 0.01 | 0.11 | 0.01 | 0.23 | 9.64 | Extracellul<br>ar |           |
| AT730_247<br>00 | 0.01 | 0.11 | 0    | 0.23 | 9.65 | Extracellul<br>ar |           |
| AT730_251<br>75 | 0.01 | 0.2  | 0    | 0.07 | 9.72 | Extracellul<br>ar |           |
| AT730_256<br>90 | 0.01 | 0.11 | 0.01 | 0.23 | 9.64 | Extracellul<br>ar |           |
| AT730_257<br>35 | 0.01 | 0.2  | 0.01 | 0.07 | 9.71 | Extracellul<br>ar |           |
| AT730_259<br>50 | 0.01 | 0.11 | 0.01 | 0.23 | 9.64 | Extracellul<br>ar |           |
| AT730_262<br>35 | 0.01 | 0.11 | 0.01 | 0.23 | 9.64 | Extracellul<br>ar |           |

---

**Supplementary Table 3. Information of extracellular secretory proteins in *Vibrio alginolyticus***

**ATCC33787**

| NCBI no.      | Product name                                                            | Locus name  | Gene name   | Pred. MW (kDa) |
|---------------|-------------------------------------------------------------------------|-------------|-------------|----------------|
| gi 1033057234 | type II toxin-antitoxin system RnIA family toxin                        | AT730_04380 | <i>rnIA</i> | 19.1           |
| gi 1033057429 | hypothetical protein                                                    | AT730_06145 |             | 63.7           |
| gi 491522781  | NAD(P)H:quinone oxidoreductase                                          | AT730_07035 | <i>wrbA</i> | 20             |
| gi 1033057543 | prepilin-type N-terminal cleavage/methylation domain-containing protein | AT730_08185 | <i>ppdD</i> | 15.5           |
| gi 1033057830 | flagellin                                                               | AT730_14920 | <i>fla</i>  | 40.9           |
| gi 516430917  | flagellin                                                               | AT730_14930 | <i>fla</i>  | 40             |
| gi 516430916  | flagellin                                                               | AT730_14935 | <i>fla</i>  | 40.5           |
| gi 1033058117 | FHA domain-containing protein                                           | AT730_19120 | <i>tagH</i> | 55.1           |
| gi 1033058135 | linear amide C-N hydrolase                                              | AT730_19300 |             | 48             |
| gi 1033058243 | baseplate J/gp47 family protein                                         | AT730_20810 |             | 42.1           |
| gi 960942174  | thermolabile hemolysin                                                  | AT730_20950 |             | 12.3           |
| gi 922668757  | SDR family oxidoreductase                                               | AT730_21050 |             | 26.1           |
| gi 1033058312 | lytic polysaccharide monooxygenase                                      | AT730_21605 | <i>lpmO</i> | 43.5           |
| gi 1033058344 | carotenoid 1,2-hydratase                                                | AT730_22220 | <i>crtC</i> | 41.8           |
| gi 1033058400 | flagellar filament capping protein                                      | AT730_22910 | <i>fliD</i> | 48             |
| gi 1033058558 | hypothetical protein                                                    | AT730_24225 |             | 26.7           |
